# Supplementary material for: Modular, polymer-directed nanoparticle assembly for fabricating metamaterials
Source: Royal Society of Chemistry journal article supplement (doi:10.1039/c5fd00134j), 2015-09-14
Supplement: c5fd00134j1.pdf [file c5fd00134j1.pdf]

## SUPPORTING INFORMATION

### Modular, Polymer-Directed Nanoparticle Assembly for Fabricating Metamaterials

Gurunatha K. Laxminarayana, Matthew Rozin, Stephanie Smith, and Andrea R. Tao\*

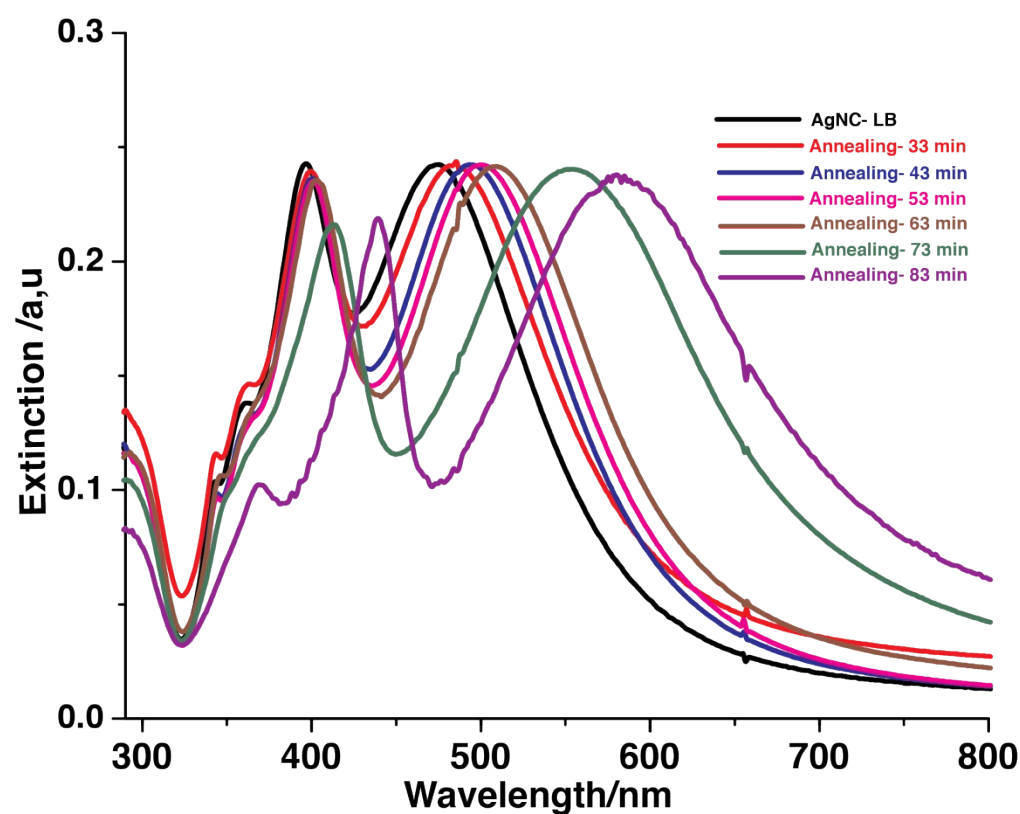

Figure S1. Optical extinction spectra of Ag NC (100 nm) embedded on PS thin-film showing red shift of dipole and quadrupolar plasmon peak upon annealing at different time.

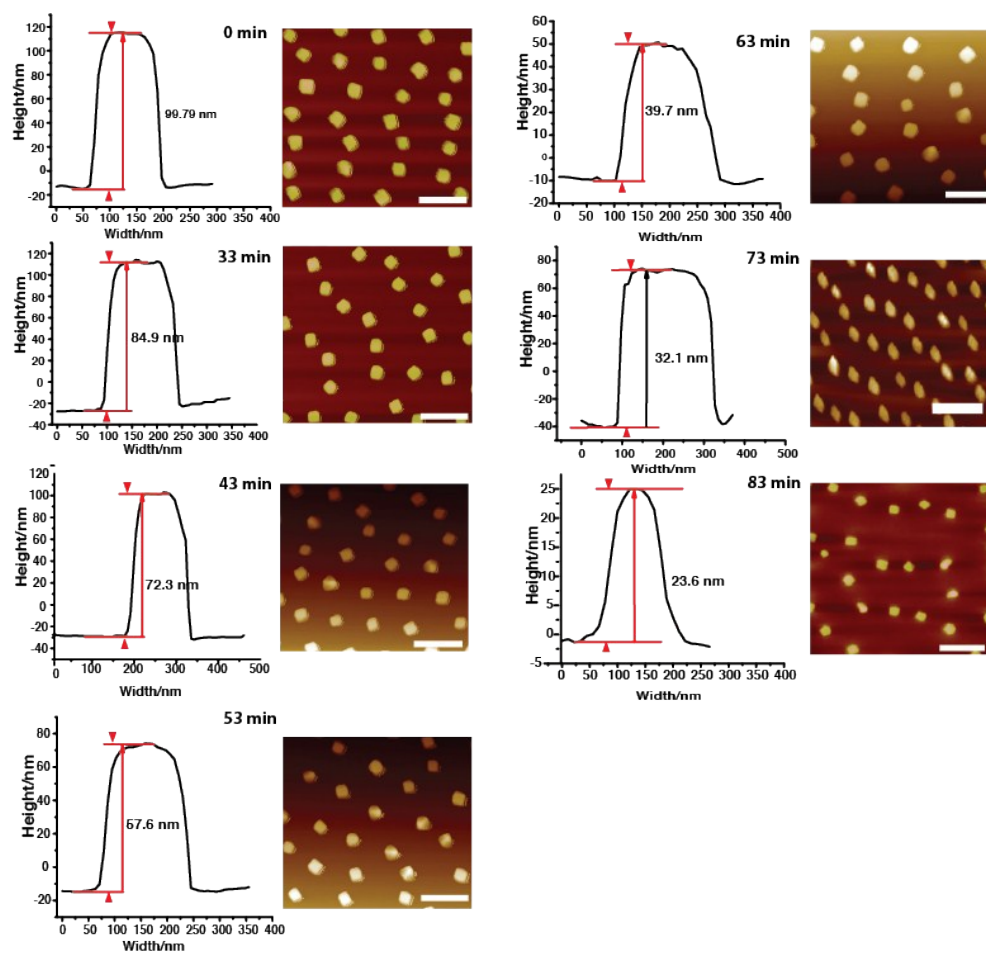

Figure S2. Corresponding AFM image of Ag NC on PS thin-film and measured embedding depth observed at different annealing time.

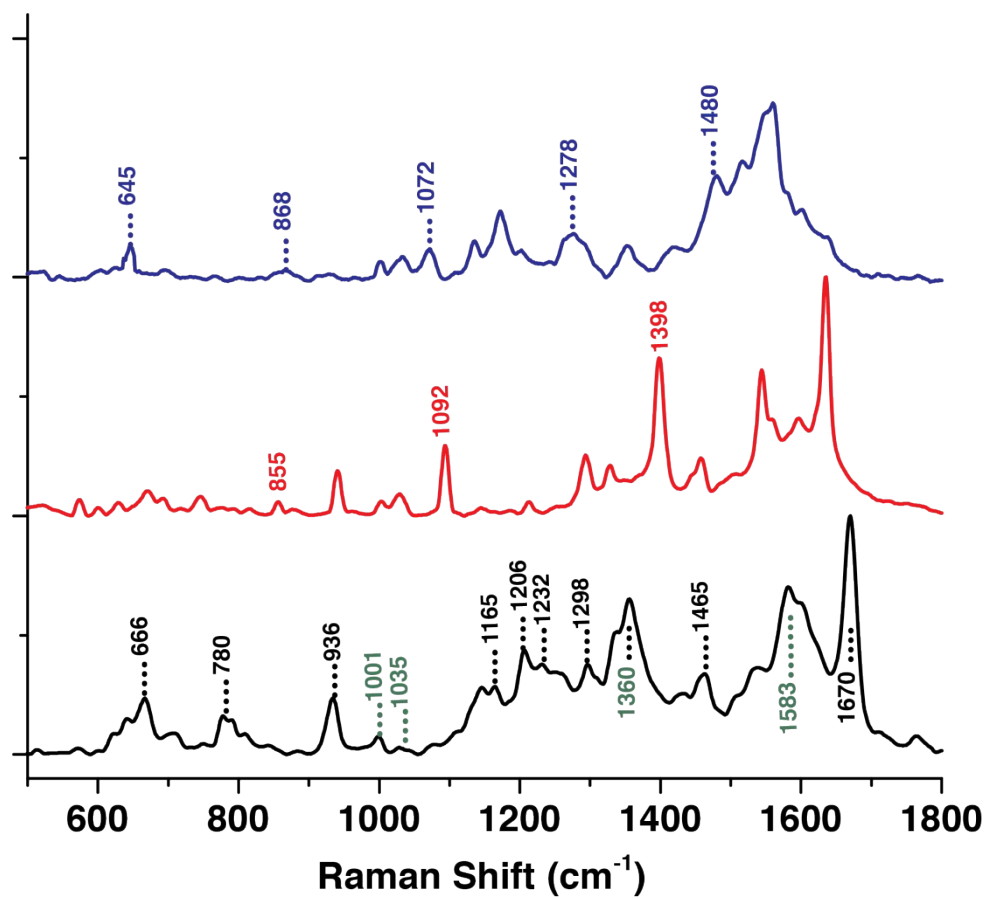

Figure S3. Raman spectra of Ag NC on PS thin-film (black), citric acid exchanged (red) and after modification with PEG dithiol (blue).
